# Supplementary material for: Associations Between Infant Screen Use, Electroencephalography Markers, and Cognitive Outcomes
Source: PubMed Central journal article supplement (PMC9887532; doi:10.1001/jamapediatrics.2022.5674), 2023-01-30

## Supplemental Online Content

Law EC, Han MX, Lai Z, et al. Associations between infant screen use, electroencephalography markers, and cognitive outcomes. *JAMA Pediatr*. Published online January 30, 2023. doi:10.1001/jamapediatrics.2022.5674

**eTable 1.** The Harvard Automated Processing Pipeline for EEG (HAPPE) processing quality metrics

**eTable 2.** Monthly household income and its association with 9-year executive function tasks

**eTable 3.** Bivariate correlations between screen time, relative theta, theta/beta ratio, and teacher-reported outcomes

**eFigure 1.** Flowchart of participant inclusion and exclusion

**eFigure 2.** Processed frontocentral (grey) and parietal (black) EEG electrodes

**eFigure 3.** Brain topographic maps of 18-month relative theta and theta/beta ratio based on monthly household income

**eFigure 4. A)** Frontocentral and **B)** Parietal theta/beta ratio individually mediated the path from screen time to executive functions

This supplemental material has been provided by the authors to give readers additional information about their work.

**eTable 1.** The Harvard Automated Processing Pipeline for EEG (HAPPE) processing quality metrics

| <b>Quality metrics</b>                                   | <b>Mean</b> | <b>SD</b> |
|----------------------------------------------------------|-------------|-----------|
| Length of raw EEG (seconds)                              | 188.70      | 28.80     |
| Good channels (%)                                        | 91.17       | 5.28      |
| Rejected independent components per recording period (%) | 35.99       | 12.68     |
| EEG variance retained (%)                                | 70.07       | 16.42     |
| Mean retained artifact probability                       | 0.11        | 0.04      |
| Median retained artifact probability                     | 0.06        | 0.05      |

**eTable 2.** Monthly household income and its association with 9-year executive function tasks

| Executive Function Domain   | Household income (Ref: <SGD 2000/month) |      |      |                                    |             |              |                                |             |                  |
|-----------------------------|-----------------------------------------|------|------|------------------------------------|-------------|--------------|--------------------------------|-------------|------------------|
|                             | SGD 2000-3999 Coefficient (95% CI)      | SE   | p    | SGD 4000-5999 Coefficient (95% CI) | SE          | p            | ≥SGD 6000 Coefficient (95% CI) | SE          | p                |
| Inhibition Scaled Score     | -0.33 (-1.39, 0.74)                     | 0.54 | 0.55 | 0.50 (-0.62, 1.62)                 | 0.57        | 0.38         | <b>2.89 (0.50, 5.29)</b>       | <b>1.21</b> | <b>0.018</b>     |
| Shifting Scaled Score       | 0.44 (-0.76, 1.64)                      | 0.61 | 0.47 | <b>2.23 (0.97, 3.50)</b>           | <b>0.64</b> | <b>0.001</b> | <b>3.38 (2.13, 4.63)</b>       | <b>0.63</b> | <b>&lt;0.001</b> |
| Working Memory Scaled Score | 0.40 (-0.32, 1.11)                      | 0.36 | 0.28 | 0.70 (-0.05, 1.45)                 | 0.38        | 0.07         | <b>1.60 (0.87, 2.34)</b>       | <b>0.37</b> | <b>&lt;0.001</b> |

**eTable 3.** Bivariate correlations between screen time, relative theta, theta/beta ratio, and teacher-reported outcomes

|                                                         | 1                           | 2                           | 3                           | 4                           | 5                     | 6                           | 7 |
|---------------------------------------------------------|-----------------------------|-----------------------------|-----------------------------|-----------------------------|-----------------------|-----------------------------|---|
| 1.<br>12-month<br>screen time                           | 1                           |                             |                             |                             |                       |                             |   |
| 2.<br>Frontocentral<br>relative theta                   | <b>0.36</b><br>(0.14, 0.57) | 1                           |                             |                             |                       |                             |   |
| 3.<br>Parietal<br>relative theta                        | <b>0.37</b><br>(0.15, 0.59) | <b>0.90</b><br>(0.86, 0.95) | 1                           |                             |                       |                             |   |
| 4.<br>Frontocentral<br>theta/beta                       | <b>0.36</b><br>(0.16, 0.57) | <b>0.86</b><br>(0.81, 0.91) | <b>0.79</b><br>(0.69, 0.89) | 1                           |                       |                             |   |
| 5.<br>Parietal<br>theta/beta                            | <b>0.35</b><br>(0.14, 0.57) | <b>0.80</b><br>(0.75, 0.85) | <b>0.88</b><br>(0.85, 0.91) | <b>0.90</b><br>(0.85, 0.95) | 1                     |                             |   |
| 6.<br>Teacher-rated<br>attention<br>problems            | <b>0.30</b><br>(0.07, 0.54) | 0.06<br>(-0.29, 0.42)       | 0.03<br>(-0.30, 0.36)       | 0.14<br>(-0.29, 0.56)       | 0.09<br>(-0.29, 0.47) | 1                           |   |
| 7.<br>Teacher-rated<br>executive<br>control<br>problems | <b>0.33</b><br>(0.10, 0.57) | -0.15<br>(-0.52, 0.21)      | 0.02<br>(-0.34, 0.39)       | -0.09<br>(-0.56, 0.39)      | 0.02<br>(-0.44, 0.48) | <b>0.61</b><br>(0.48, 0.74) | 1 |

**eFigure 1.** Flowchart of participant inclusion and exclusion

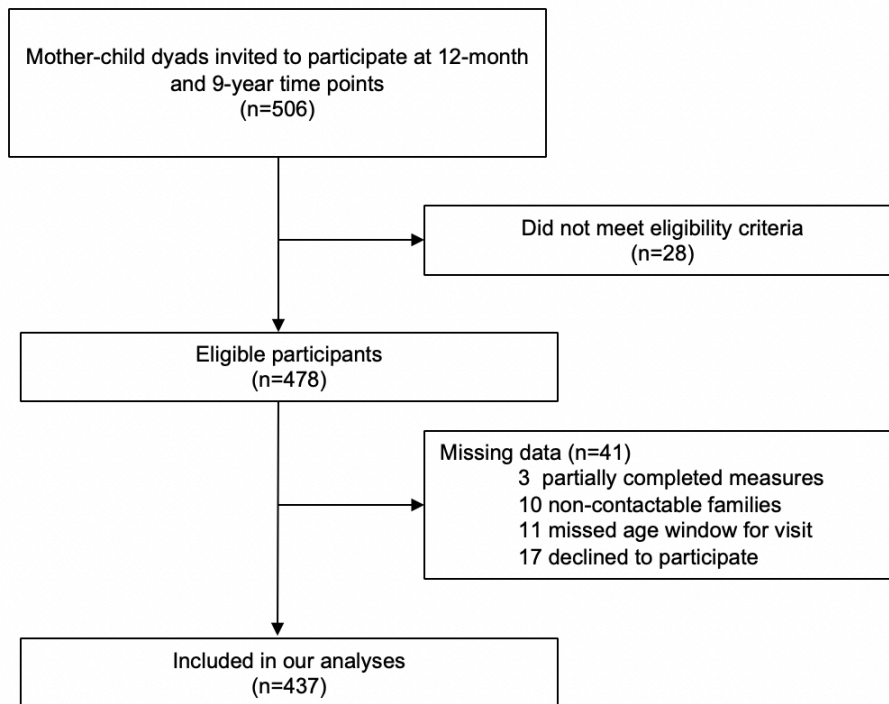

**eFigure 2.** Processed frontocentral (grey) and parietal (black) EEG electrodes

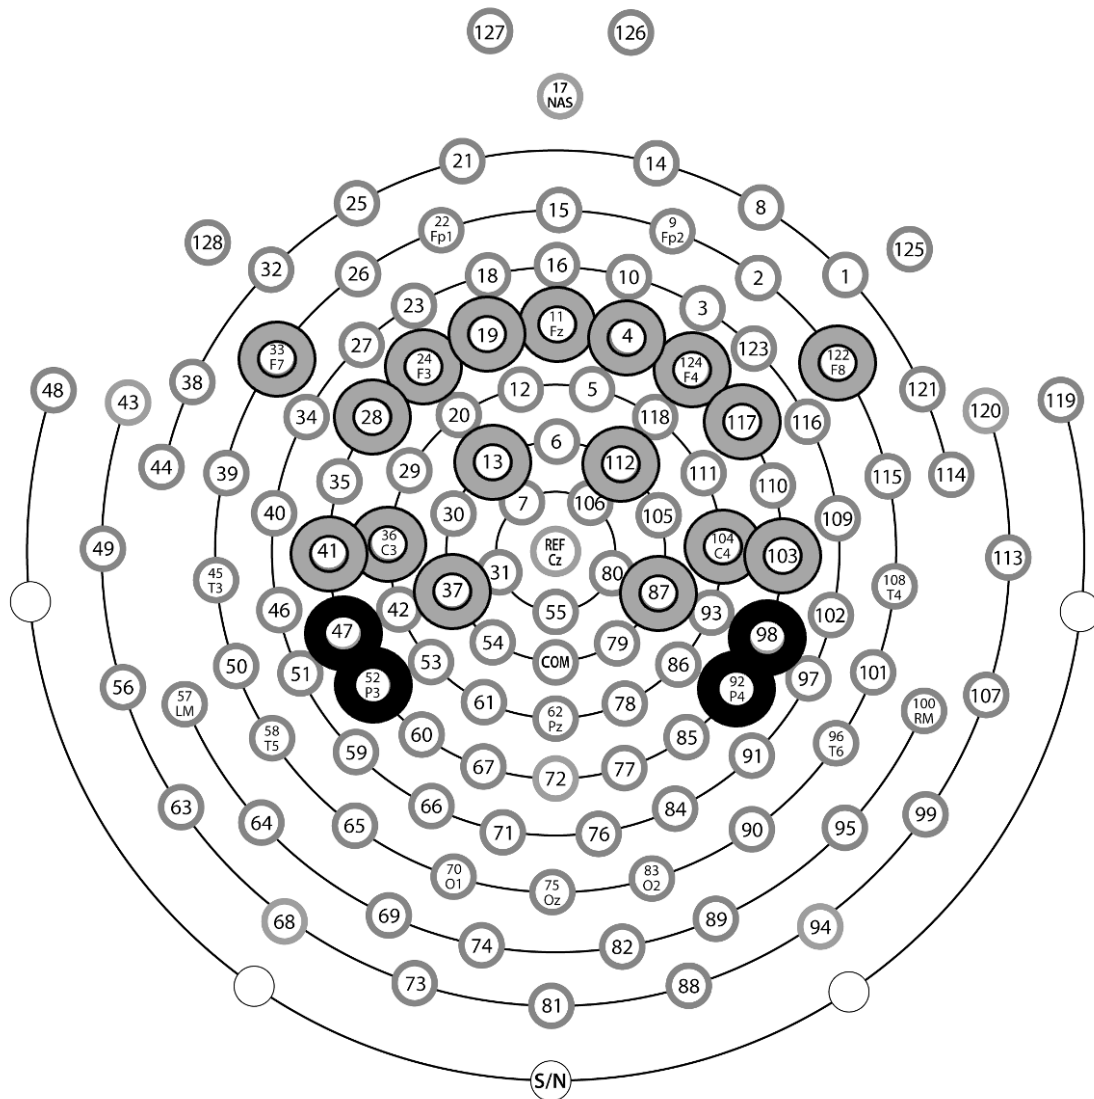

**eFigure 3.** Brain topographic maps of 18-month relative theta and theta/beta ratio based on monthly household income

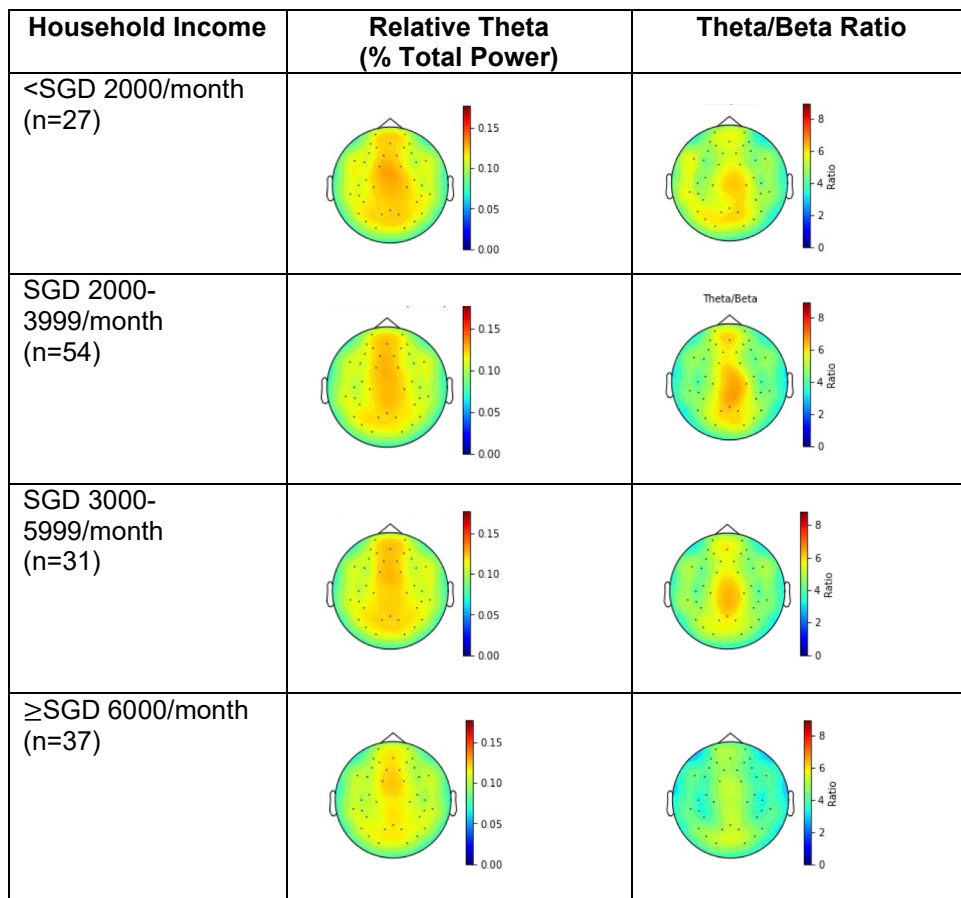

**eFigure 4. A) Frontocentral and B) Parietal theta/beta ratio individually mediated the path from screen time to executive functions**

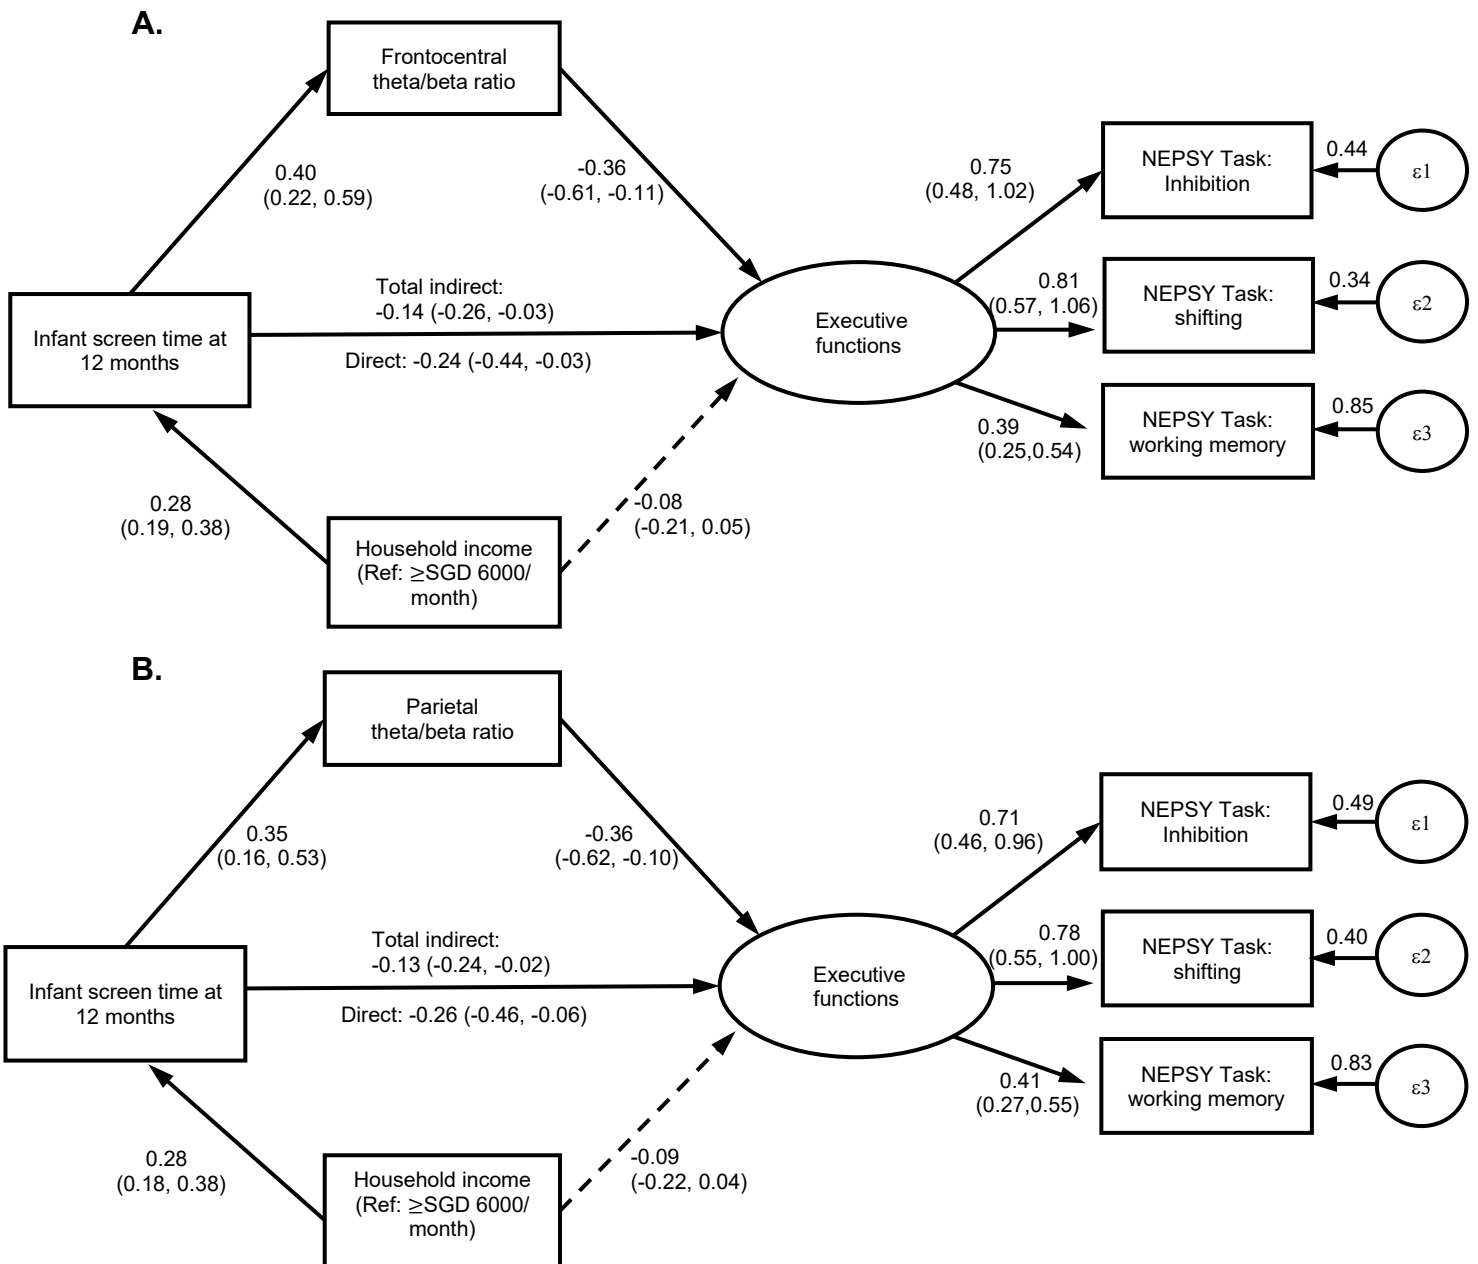

Supplement: jamapediatr-e225674-s001.pdf [file jamapediatr-e225674-s001.pdf]
