# Supplementary material for: Associations Between Infant Screen Use, Electroencephalography Markers, and Cognitive Outcomes
Source: PubMed Central journal article supplement (PMC9887532; doi:10.1001/jamapediatrics.2022.5674), 2023-01-30
Supplement: jamapediatr-e225674-s002.pdf [file jamapediatr-e225674-s002.pdf]

## Data Sharing Statement

Law. Associations Between Infant Screen Use, Electroencephalography Markers, and Cognitive Outcomes. *JAMA Pediatr.* Published January 30, 2023.

doi:10.1001/jamapediatrics.2022.5674

### Data

**Data available:** No

### Additional Information

**Explanation for why data not available:** This cohort study requires ethics approval for each specific research question before data may be shared. The data used in this cohort are described in <https://gustodatavault.sg/>. The data will be made available to researchers who provide a methodologically sound proposal.
